# Supplementary material for: Enhanced Sleep Is an Evolutionarily Adaptive Response to Starvation Stress in Drosophila
Source: PubMed Central journal article supplement (PMC4493134; doi:10.1371/journal.pone.0131275), 2015-07-06

Figure Suppl 1

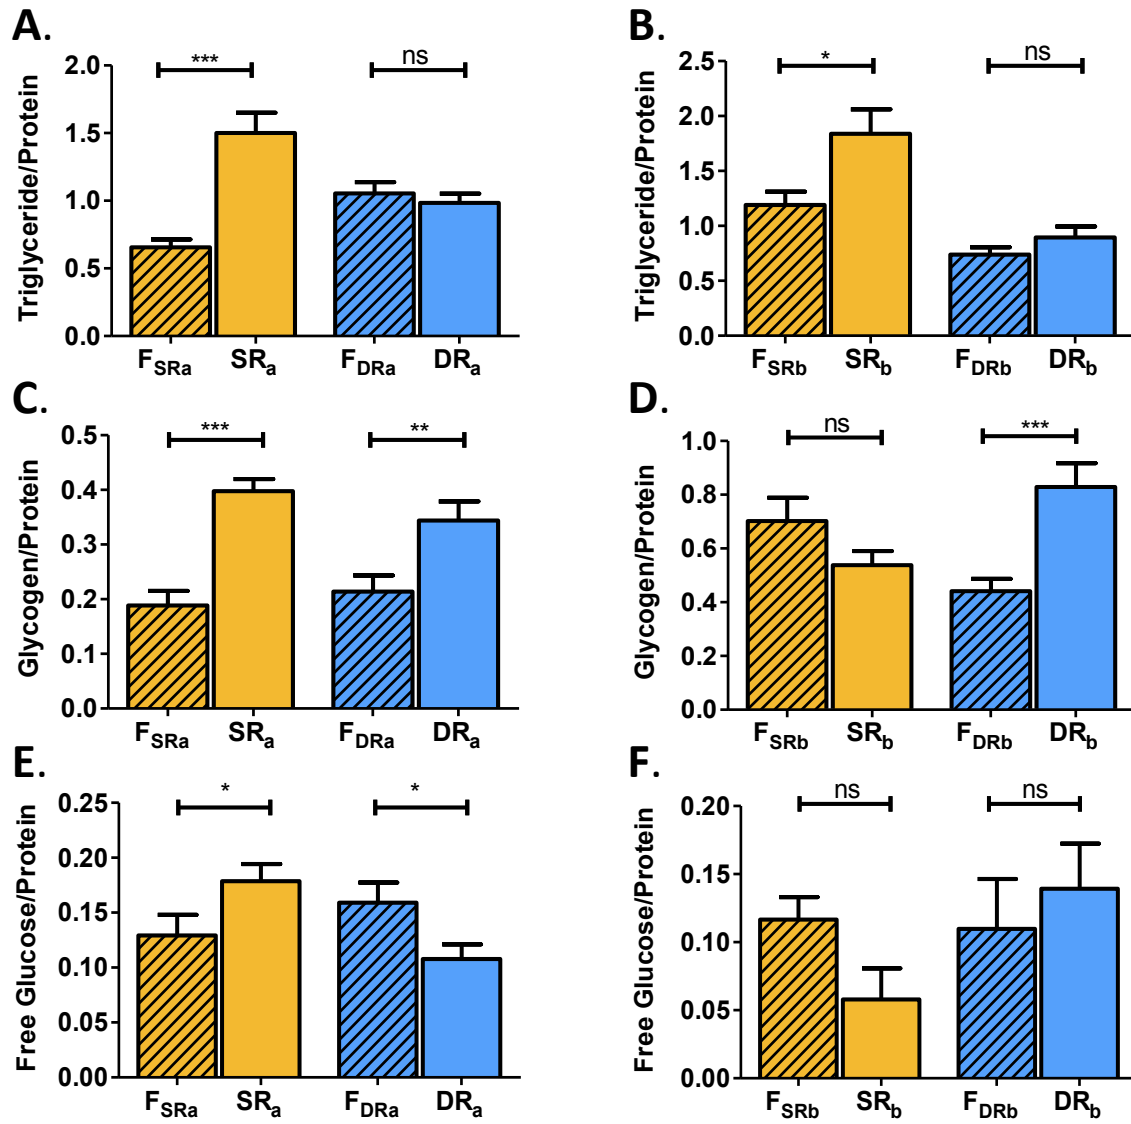

Supplement: pone.0131275.s001.pdf [file pone.0131275.s001.pdf]
