# Supplementary material for: Enhanced Sleep Is an Evolutionarily Adaptive Response to Starvation Stress in Drosophila
Source: PubMed Central journal article supplement (PMC4493134; doi:10.1371/journal.pone.0131275), 2015-07-06

# Figure Suppl 3

**A.**

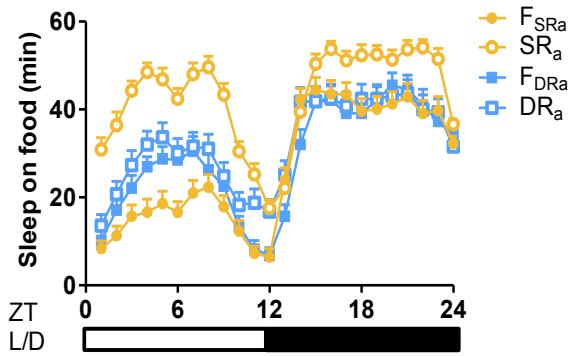

**B.**

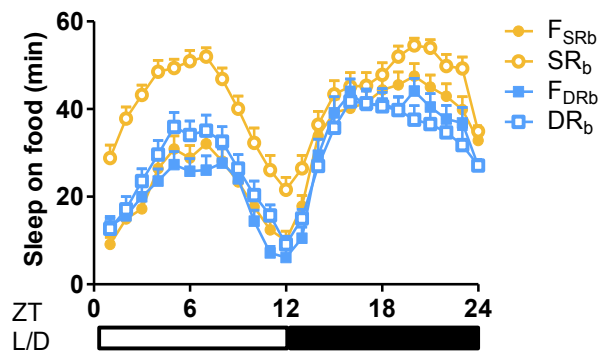

**C.**

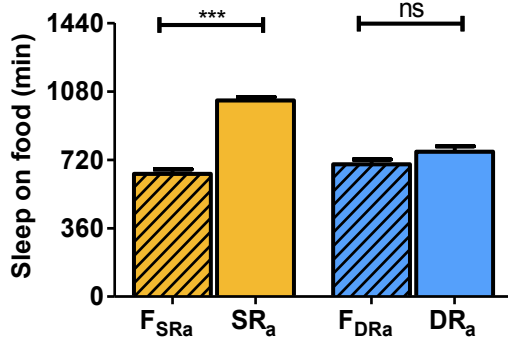

**D.**

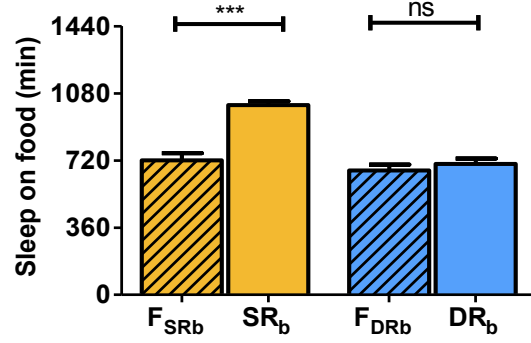

**E.**

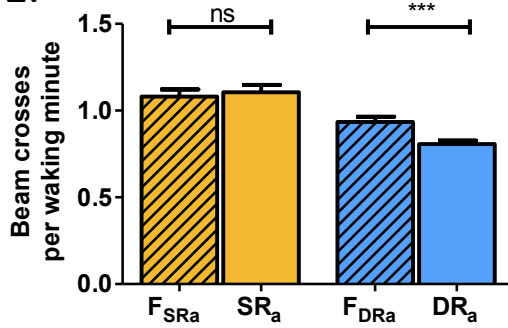

**F.**

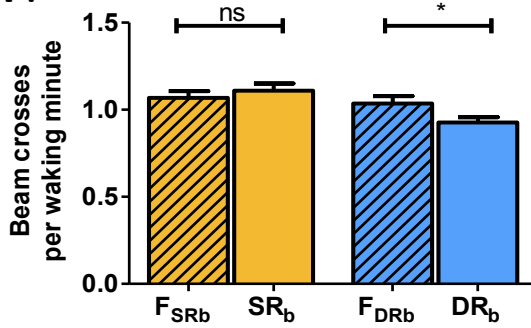

Supplement: pone.0131275.s003.pdf [file pone.0131275.s003.pdf]
